# Supplementary material for: Analysis of Trend and Associated Factors of Neuropsychological Development of Infants and Toddlers Based on Longitudinal Data
Source: MDPI journal article supplement (doi:10.3390/children8100866), 2021-09-28
Supplement: s1 [file s1]

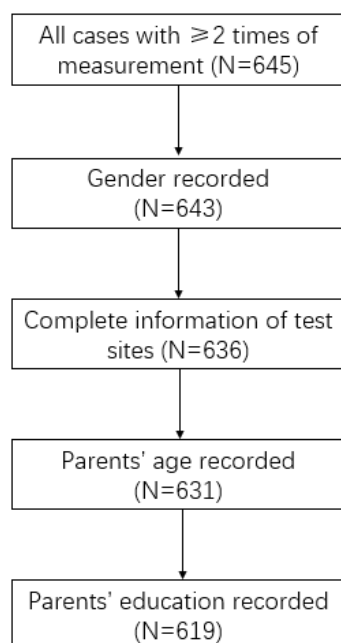

**Figure S1.** Flow chart of case selection.

**Table S1.** Demographic comparison between the norms and study population in different age groups.

| Low age group      |                              |                            | Medium age group      |                                      |                              | High age group             |                       |                                      |                                |                            |                       |
|--------------------|------------------------------|----------------------------|-----------------------|--------------------------------------|------------------------------|----------------------------|-----------------------|--------------------------------------|--------------------------------|----------------------------|-----------------------|
|                    | Norm<br>( <i>n</i> =<br>965) | SP<br>( <i>n</i> =<br>193) | <i>P</i><br>valu<br>e |                                      | Norm<br>( <i>n</i> =<br>870) | SP<br>( <i>n</i> =<br>145) | <i>P</i><br>valu<br>e |                                      | Norm<br>( <i>n</i> =<br>1 004) | SP<br>( <i>n</i> =<br>251) | <i>P</i><br>valu<br>e |
| Gender             |                              |                            | 0.81<br>1             | Gender                               |                              |                            | 0.81<br>7             | Gender                               |                                |                            | 0.95<br>5             |
| Male               | 551<br>(57.1)                | 112<br>(58)                |                       | Male                                 | 471<br>(54.1)                | 80<br>(55.2)               |                       | Male                                 | 558<br>(55.6)                  | 140<br>(55.8)              |                       |
| Female             | 414<br>(42.9)                | 81<br>(42)                 |                       | Female                               | 399<br>(45.9)                | 65<br>(44.8)               |                       | Female                               | 446<br>(44.4)                  | 111<br>(44.2)              |                       |
| Province           |                              |                            | 0.48<br>8             | Province                             |                              |                            | 0.92<br>7             | Province                             |                                |                            | 0.16<br>8             |
| Beijing            | 65<br>(6.7)                  | 12<br>(6.2)                |                       | Beijing                              | 149<br>(19.4)                | 26<br>(17.9)               |                       | Beijing                              | 420<br>(41.8)                  | 120<br>(47.8)              |                       |
| Shang-<br>hai      | 562<br>(58.2)                | 106<br>(54.9)              |                       | Shang-<br>hai                        | 482<br>(55.4)                | 83<br>(57.2)               |                       | Shang-<br>hai                        | 475<br>(47.3)                  | 100<br>(39.8)              |                       |
| Guang-<br>dong     | 300<br>(31.1)                | 63<br>(32.6)               |                       | Guang-<br>dong                       | 208<br>(21.6)                | 31<br>(21.4)               |                       | Guang-<br>dong                       | 64<br>(6.4)                    | 16<br>(6.4)                |                       |
| Others             | 38<br>(3.9)                  | 12<br>(6.2)                |                       | Others                               | 31<br>(3.6)                  | 5 (3.4)                    |                       | Others                               | 45<br>(4.5)                    | 15 (6)                     |                       |
| Father's education |                              |                            | 0.97<br>3             | Father's education                   |                              |                            | 0.99<br>7             | Father's education                   |                                |                            | 0.95<br>0             |
| Postgra-<br>duate  | 94<br>(9.7)                  | 18<br>(9.3)                |                       | Postgra-<br>duate                    | 80<br>(9.2)                  | 14<br>(9.7)                |                       | Postgra-<br>duate                    | 99<br>(9.9)                    | 27<br>(10.8)               |                       |
| Bachelor           | 770<br>(79.8)                | 154<br>(79.8)              |                       | Bache-<br>lor                        | 579<br>(66.6)                | 96<br>(66.2)               |                       | Bache-<br>lor                        | 556<br>(55.4)                  | 135<br>(53.8)              |                       |
| Junior<br>college  | 94<br>(9.7)                  | 19<br>(9.8)                |                       | Junior<br>college                    | 148<br>(17)                  | 25<br>(17.2)               |                       | Junior<br>college                    | 221<br>(22)                    | 55<br>(21.9)               |                       |
| High<br>school     | 7 (0.7)                      | 2 (1)                      |                       | High<br>school                       | 63<br>(7.2)                  | 10<br>(6.9)                |                       | High<br>school                       | 128<br>(12.7)                  | 34<br>(13.5)               |                       |
| Mother's education |                              |                            | 0.94<br>2             | Mother's educa-<br>tion              |                              |                            | 0.86<br>0             | Mother's educa-<br>tion              |                                |                            | 0.96<br>3             |
| Postgra-<br>duate  | 65<br>(6.7)                  | 14<br>(7.3)                |                       | Postgra-<br>duate                    | 79<br>(9.1)                  | 11<br>(7.6)                |                       | Postgra-<br>duate                    | 59<br>(5.9)                    | 15 (6)                     |                       |
| Bachelor           | 769<br>(79.7)                | 151<br>(78.2)              |                       | Bache-<br>lor                        | 570<br>(65.5)                | 93<br>(64.1)               |                       | Bache-<br>lor                        | 595<br>(59.3)                  | 147<br>(58.6)              |                       |
| Junior<br>college  | 116<br>(12)                  | 24<br>(12.4)               |                       | Junior<br>college                    | 160<br>(18.4)                | 30<br>(20.7)               |                       | Junior<br>college                    | 230<br>(22.9)                  | 56<br>(22.3)               |                       |
| High<br>school     | 15<br>(1.6)                  | 4 (2.1)                    |                       | High<br>school                       | 61 (7)                       | 11<br>(7.6)                |                       | High<br>school                       | 120<br>(12)                    | 33<br>(13.1)               |                       |
| Physiologi-<br>cal |                              |                            | 0.95<br>0             | Physio-<br>logical<br>age<br>(month) |                              |                            | 0.97<br>9             | Physio-<br>logical<br>age<br>(month) |                                |                            | 0.92<br>5             |

| age<br>(month)           |               |               |           |                          |               |               |           |                          |               |               |
|--------------------------|---------------|---------------|-----------|--------------------------|---------------|---------------|-----------|--------------------------|---------------|---------------|
| 0-3                      | 153<br>(15.9) | 31<br>(16.1)  |           | 13-15                    | 200<br>(23)   | 34<br>(23.4)  |           | 25-27                    | 119<br>(11.9) | 33<br>(13.1)  |
| 4-6                      | 154<br>(16)   | 33<br>(17.1)  |           | 16-18                    | 132<br>(15.2) | 20<br>(13.8)  |           | 28-30                    | 212<br>(21.1) | 52<br>(20.7)  |
| 7-9                      | 232<br>(24)   | 43<br>(22.3)  |           | 19-21                    | 134<br>(15.4) | 23<br>(15.9)  |           | 31-33                    | 287<br>(28.6) | 68<br>(27.1)  |
| 10-12                    | 426<br>(44.1) | 86<br>(44.6)  |           | 22-24                    | 404<br>(46.4) | 68<br>(46.9)  |           | 34-36                    | 386<br>(38.4) | 98<br>(39)    |
| Paternal<br>age (yrs)    |               |               | 0.78<br>1 | Paternal<br>age<br>(yrs) |               |               | 0.89<br>0 | Paternal<br>age<br>(yrs) |               | 0.97<br>0     |
| <30                      | 101<br>(10.5) | 22<br>(11.4)  |           | <30                      | 65<br>(7.5)   | 10<br>(6.9)   |           | <30                      | 102<br>(10.2) | 26<br>(10.4)  |
| 30-35                    | 678<br>(70.3) | 130<br>(67.4) |           | 30-35                    | 547<br>(62.9) | 92<br>(63.4)  |           | 30-35                    | 663<br>(66)   | 162<br>(64.5) |
| 36-40                    | 149<br>(15.4) | 31<br>(16.1)  |           | 36-40                    | 216<br>(24.8) | 34<br>(23.4)  |           | 36-40                    | 177<br>(17.6) | 46<br>(18.3)  |
| >40                      | 37<br>(3.8)   | 10<br>(5.2)   |           | >40                      | 42<br>(4.8)   | 9 (6.2)       |           | >40                      | 62<br>(6.2)   | 17<br>(6.8)   |
| Maternal<br>age<br>(yrs) |               |               | 0.95<br>3 | Maternal<br>age<br>(yrs) |               |               | 0.81<br>3 | Maternal<br>age<br>(yrs) |               | 0.97<br>3     |
| <30                      | 296<br>(30.7) | 58<br>(30.1)  |           | <30                      | 173<br>(19.9) | 27<br>(18.6)  |           | <30                      | 258<br>(25.7) | 62<br>(24.7)  |
| 30-35                    | 565<br>(58.5) | 115<br>(59.6) |           | 30-35                    | 614<br>(70.6) | 101<br>(69.7) |           | 30-35                    | 621<br>(61.9) | 157<br>(62.5) |
| 36-40                    | 97<br>(10.1)  | 18<br>(9.3)   |           | 36-40                    | 59<br>(6.8)   | 13 (9)        |           | 36-40                    | 112<br>(11.2) | 28<br>(11.2)  |
| >40                      | 7 (0.7)       | 2 (1)         |           | >40                      | 24<br>(2.8)   | 4 (2.8)       |           | >40                      | 13<br>(1.3)   | 4 (1.6)       |

Note: All the P value>0.05, indicating no difference of demographic characteristic between the norm population and study population; SP=Study population.

**Table S2.** Rating criteria based on norms of three age groups.

| Area | Physiological age (month) |                    |                     | Rating    |
|------|---------------------------|--------------------|---------------------|-----------|
|      | 1–12<br>(n = 965)         | 13–24<br>(n = 870) | 25–36<br>(n = 1004) |           |
| GM   | ≥-2                       | ≥-4                | ≥-7                 | Qualified |
|      | <-2                       | <-4                | <-7                 | Delayed   |
| FM   | ≥-2                       | ≥-5                | ≥-7                 | Qualified |
|      | <-2                       | <-5                | <-7                 | Delayed   |
| CG   | ≥-1                       | ≥-4                | ≥-6                 | Qualified |
|      | <-1                       | <-4                | <-6                 | Delayed   |
| LG   | ≥-2                       | ≥-4                | ≥-7                 | Qualified |
|      | <-2                       | <-4                | <-7                 | Delayed   |
| SE   | ≥-2                       | ≥-5                | ≥-7                 | Qualified |
|      | <-2                       | <-5                | <-7                 | Delayed   |
| SC   | ≥-2                       | ≥-4                | ≥-7                 | Qualified |
|      | <-2                       | <-4                | <-7                 | Delayed   |

---

Note: GM=Gross motor, FM=Fine motor, CG=Cognition, LG=Language, SE=Social emotion, SC=Self-care; the rating criteria was based on the difference between development age and physiological age, for example, if a child aged 6 years had the GM development age of 4 years ( $4-6\geq-2$ ), then he was regarded as “qualified” in GM according to our criteria.
